# Supplementary material
Source: PubMed Central journal article supplement (PMC7036280)
Supplement: NIHMS1556699-supplement-1.pdf [file NIHMS1556699-supplement-1.pdf]

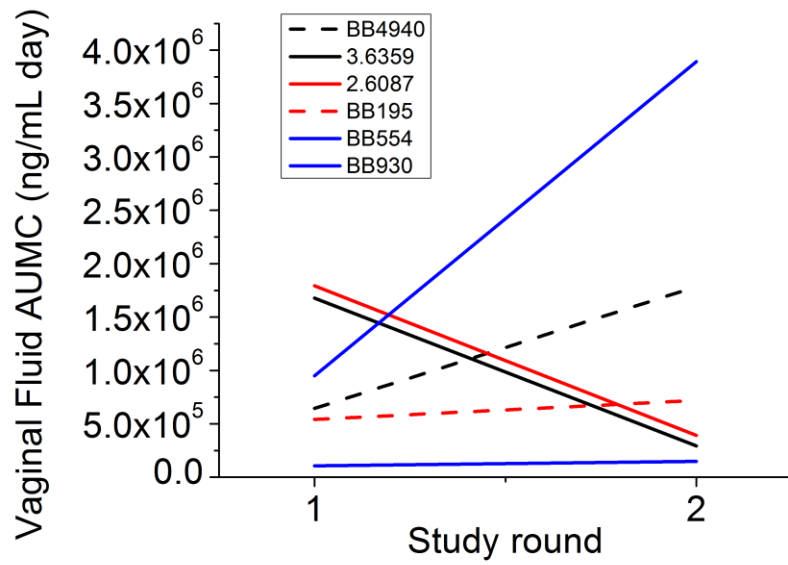

Figure S1.

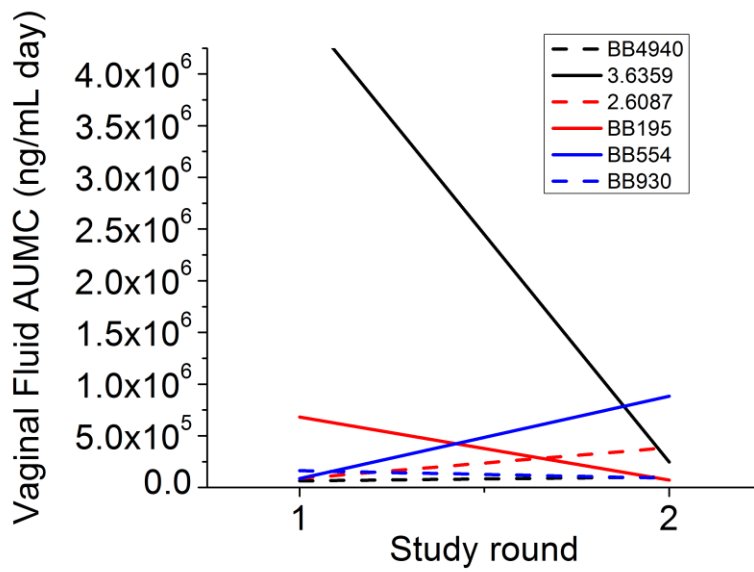

Figure S2.

Figure S1. Comparison of proximal vaginal fluid AUMC per animal after two week washout. AUMCs following the expected trend are solid lines, AUMC opposite trend are in dashed lines. Black lines

indicate animals which had full rings in the first round which received half rings in the second round of the study. Red lines indicate animals with half rings in the first round of the study that received quarter rings in the second round, and blue lines indicate animals which had quarter rings in the first round which received full rings in the second round of the study.

**Figure S2.** Comparison of distal vaginal fluid AUMC per animal after two week washout. AUMCs following the expected trend are solid lines, AUMC opposite trend are in dashed lines. Black lines indicate animals which had full rings in the first round which received half rings in the second round of the study. Red lines indicate animals with half rings in the first round of the study that received quarter rings in the second round, and blue lines indicate animals which had quarter rings in the first round which received full rings in the second round of the study.
